# Supplementary material
Source: publisher figshare collection journal article supplement (https://acs.figshare.com/ndownloader/files/4603444)
Supplement: Supplementary file 1 [file 4603444]

 
data_3 
 
_audit_creation_method            SHELXL-97 
_chemical_name_systematic 
; 
 ? 
; 
_chemical_name_common             ? 
_chemical_melting_point           ? 
_chemical_formula_moiety          ? 
_chemical_formula_sum 
 'C23 H44 Cl3 O2 P Pd' 
_chemical_formula_weight          596.30 
 
loop_ 
 _atom_type_symbol 
 _atom_type_description 
 _atom_type_scat_dispersion_real 
 _atom_type_scat_dispersion_imag 
 _atom_type_scat_source 
 'C'  'C'   0.0033   0.0016 
 'International Tables Vol C Tables 4.2.6.8 and 6.1.1.4' 
 'H'  'H'   0.0000   0.0000 
 'International Tables Vol C Tables 4.2.6.8 and 6.1.1.4' 
 'Cl'  'Cl'   0.1484   0.1585 
 'International Tables Vol C Tables 4.2.6.8 and 6.1.1.4' 
 'O'  'O'   0.0106   0.0060 
 'International Tables Vol C Tables 4.2.6.8 and 6.1.1.4' 
 'P'  'P'   0.1023   0.0942 
 'International Tables Vol C Tables 4.2.6.8 and 6.1.1.4' 
 'Pd'  'Pd'  -0.9988   1.0072 
 'International Tables Vol C Tables 4.2.6.8 and 6.1.1.4' 
 
_symmetry_cell_setting            'monoclinic' 
_symmetry_space_group_name_H-M    'P21/n'
 
loop_ 
 _symmetry_equiv_pos_as_xyz 
 'x, y, z' 
 '-x+1/2, y+1/2, -z+1/2' 
 '-x, -y, -z' 
 'x-1/2, -y-1/2, z-1/2' 
 
_cell_length_a                    12.052(9) 
_cell_length_b                    10.073(7) 
_cell_length_c                    22.418(17) 
_cell_angle_alpha                 90.000(3) 
_cell_angle_beta                  104.159(3) 
_cell_angle_gamma                 90.000(3) 
_cell_volume                      2639(3) 
_cell_formula_units_Z             4 
_cell_measurement_temperature           103.1500
_cell_measurement_reflns_used           8878
_cell_measurement_theta_min             3.0088
_cell_measurement_theta_max             27.4835
 
_exptl_crystal_description              'Platelet'
_exptl_crystal_colour                   'Orange'
_exptl_crystal_size_max           0.30 
_exptl_crystal_size_mid           0.30 
_exptl_crystal_size_min           0.10 
_exptl_crystal_density_meas       ? 
_exptl_crystal_density_diffrn     1.501 
_exptl_crystal_density_method     'not measured' 
_exptl_crystal_F_000              1240 
_exptl_absorpt_coefficient_mu     1.085 
_exptl_absorpt_correction_type          'Multi-scan'
_exptl_absorpt_correction_T_min   0.7366 
_exptl_absorpt_correction_T_max   0.8992 
_exptl_absorpt_process_details    ? 
 
_exptl_special_details 
; 
 ? 
; 
 
_diffrn_ambient_temperature       103(2) 
_diffrn_radiation_wavelength      0.71070 
_diffrn_radiation_type            MoK\a 
_diffrn_radiation_source          'fine-focus sealed tube' 
_diffrn_radiation_monochromator   graphite 
_diffrn_measurement_device_type   'RIGAKU/MSC Meacury CCD' 
_diffrn_measurement_method        'omega scans'  
_diffrn_detector_area_resol_mean  7.31 
_diffrn_reflns_number             20235 
_diffrn_reflns_av_R_equivalents   0.0306 
_diffrn_reflns_av_sigmaI/netI     0.0287 
_diffrn_reflns_limit_h_min        -14 
_diffrn_reflns_limit_h_max        15 
_diffrn_reflns_limit_k_min        -13 
_diffrn_reflns_limit_k_max        12 
_diffrn_reflns_limit_l_min        -28 
_diffrn_reflns_limit_l_max        28 
_diffrn_reflns_theta_min          3.01 
_diffrn_reflns_theta_max          27.48 
_reflns_number_total              5928 
_reflns_number_gt                 5375 
_reflns_threshold_expression      >2sigma(I) 
 
_computing_data_collection        'RIGAKU CrystalClear' 
_computing_cell_refinement        'RIGAKU CrystalClear' 
_computing_data_reduction         'RIGAKU CrystalClear' 
_computing_structure_solution     'SHELXS-97 (Sheldrick, 1997)' 
_computing_structure_refinement   'SHELXL-97 (Sheldrick, 1997)' 
_computing_molecular_graphics     'ORTEP-III' 
_computing_publication_material   ?
 
_refine_special_details 
; 
 Refinement of F^2^ against ALL reflections.  The weighted R-factor wR and 
 goodness of fit S are based on F^2^, conventional R-factors R are based 
 on F, with F set to zero for negative F^2^. The threshold expression of 
 F^2^ > 2sigma(F^2^) is used only for calculating R-factors(gt) etc. and is 
 not relevant to the choice of reflections for refinement.  R-factors based 
 on F^2^ are statistically about twice as large as those based on F, and R- 
 factors based on ALL data will be even larger. 
; 
 
_refine_ls_structure_factor_coef  Fsqd  
_refine_ls_matrix_type            full 
_refine_ls_weighting_scheme       calc  
_refine_ls_weighting_details 
 'calc w=1/[\s^2^(Fo^2^)+(0.0218P)^2^+1.7865P] where P=(Fo^2^+2Fc^2^)/3' 
_atom_sites_solution_primary      direct 
_atom_sites_solution_secondary    difmap 
_atom_sites_solution_hydrogens    geom 
_refine_ls_hydrogen_treatment     constr 
_refine_ls_extinction_coef        ? 
_refine_ls_number_reflns          5928 
_refine_ls_number_parameters      282 
_refine_ls_number_restraints      0 
_refine_ls_R_factor_all           0.0329 
_refine_ls_R_factor_gt            0.0274 
_refine_ls_wR_factor_ref          0.0600 
_refine_ls_wR_factor_gt           0.0577 
_refine_ls_goodness_of_fit_ref    1.088 
_refine_ls_restrained_S_all       1.088 
_refine_ls_shift/su_max           0.002 
_refine_ls_shift/su_mean          0.000 
 
loop_ 
 _atom_site_label 
 _atom_site_type_symbol 
 _atom_site_fract_x 
 _atom_site_fract_y 
 _atom_site_fract_z 
 _atom_site_U_iso_or_equiv 
 _atom_site_adp_type 
 _atom_site_occupancy 
 _atom_site_symetry_multiplicity 
 _atom_site_calc_flag 
 _atom_site_refinement_flags 
 _atom_site_disorder_assembly 
 _atom_site_disorder_group 
Pd1 Pd 0.512047(12) 0.873923(14) 0.798269(7) 0.01247(5) Uani 1 1 d . . . 
C1 C 0.61661(16) 0.91490(19) 0.88293(9) 0.0135(4) Uani 1 1 d . . . 
H1 H 0.6487 0.8305 0.9036 0.016 Uiso 1 1 calc R . . 
C2 C 0.71484(17) 1.0086(2) 0.87758(9) 0.0157(4) Uani 1 1 d . . . 
H2 H 0.7439 0.9957 0.8398 0.019 Uiso 1 1 calc R . . 
C3 C 0.80732(17) 0.9980(2) 0.93920(9) 0.0179(4) Uani 1 1 d . . . 
H3 H 0.8775 1.0473 0.9374 0.021 Uiso 1 1 calc R . . 
H4 H 0.8274 0.9043 0.9501 0.021 Uiso 1 1 calc R . . 
C4 C 0.74614(17) 1.0636(2) 0.98607(9) 0.0156(4) Uani 1 1 d . . . 
H5 H 0.7299 0.9942 1.0147 0.019 Uiso 1 1 calc R . . 
C5 C 0.63263(17) 1.11362(19) 0.94438(9) 0.0156(4) Uani 1 1 d . . . 
H6 H 0.5971 1.1891 0.9620 0.019 Uiso 1 1 calc R . . 
C6 C 0.55273(16) 0.9930(2) 0.92484(9) 0.0145(4) Uani 1 1 d . . . 
H7 H 0.5531 0.9382 0.9621 0.017 Uiso 1 1 calc R . . 
C7 C 0.42969(17) 1.0362(2) 0.89548(10) 0.0208(5) Uani 1 1 d . . . 
H8 H 0.4010 1.0902 0.9248 0.031 Uiso 1 1 calc R . . 
H9 H 0.3812 0.9575 0.8844 0.031 Uiso 1 1 calc R . . 
H10 H 0.4281 1.0886 0.8584 0.031 Uiso 1 1 calc R . . 
C8 C 0.66668(18) 1.14667(19) 0.88418(9) 0.0178(4) Uani 1 1 d . . . 
H11 H 0.6001 1.1692 0.8500 0.021 Uiso 1 1 calc R . . 
H12 H 0.7254 1.2173 0.8894 0.021 Uiso 1 1 calc R . . 
C9 C 0.81567(18) 1.1736(2) 1.02271(9) 0.0171(4) Uani 1 1 d . . . 
O1 O 0.79472(13) 1.29039(15) 1.01690(7) 0.0240(3) Uani 1 1 d . . . 
O2 O 0.90645(13) 1.12471(15) 1.06428(7) 0.0228(3) Uani 1 1 d . . . 
C10 C 0.9787(2) 1.2216(2) 1.10282(10) 0.0253(5) Uani 1 1 d . . . 
H13 H 1.0095 1.2830 1.0770 0.038 Uiso 1 1 calc R . . 
H14 H 1.0418 1.1762 1.1314 0.038 Uiso 1 1 calc R . . 
H15 H 0.9336 1.2713 1.1262 0.038 Uiso 1 1 calc R . . 
Cl1 Cl 0.47655(4) 1.07352(5) 0.74105(2) 0.02070(11) Uani 1 1 d . . . 
P1 P 0.51489(4) 0.65135(5) 0.80879(2) 0.01136(10) Uani 1 1 d . . . 
C11 C 0.66310(17) 0.5763(2) 0.81731(9) 0.0158(4) Uani 1 1 d . . . 
C12 C 0.73359(17) 0.6724(2) 0.78764(10) 0.0193(4) Uani 1 1 d . . . 
H16 H 0.8103 0.6357 0.7915 0.029 Uiso 1 1 calc R . . 
H17 H 0.7396 0.7585 0.8086 0.029 Uiso 1 1 calc R . . 
H18 H 0.6956 0.6841 0.7440 0.029 Uiso 1 1 calc R . . 
C13 C 0.66242(19) 0.4392(2) 0.78779(10) 0.0196(4) Uani 1 1 d . . . 
H19 H 0.7405 0.4037 0.7971 0.029 Uiso 1 1 calc R . . 
H20 H 0.6331 0.4468 0.7431 0.029 Uiso 1 1 calc R . . 
H21 H 0.6132 0.3792 0.8042 0.029 Uiso 1 1 calc R . . 
C14 C 0.72844(18) 0.5641(2) 0.88532(10) 0.0198(4) Uani 1 1 d . . . 
H22 H 0.6904 0.4986 0.9058 0.030 Uiso 1 1 calc R . . 
H23 H 0.7293 0.6504 0.9056 0.030 Uiso 1 1 calc R . . 
H24 H 0.8072 0.5356 0.8878 0.030 Uiso 1 1 calc R . . 
C15 C 0.42310(17) 0.6139(2) 0.72816(9) 0.0160(4) Uani 1 1 d . . . 
C16 C 0.49170(19) 0.6443(2) 0.67975(9) 0.0200(4) Uani 1 1 d . . . 
H25 H 0.4413 0.6362 0.6384 0.030 Uiso 1 1 calc R . . 
H26 H 0.5551 0.5811 0.6844 0.030 Uiso 1 1 calc R . . 
H27 H 0.5222 0.7348 0.6858 0.030 Uiso 1 1 calc R . . 
C17 C 0.37543(19) 0.4721(2) 0.71740(10) 0.0214(5) Uani 1 1 d . . . 
H28 H 0.3199 0.4574 0.7422 0.032 Uiso 1 1 calc R . . 
H29 H 0.4382 0.4082 0.7294 0.032 Uiso 1 1 calc R . . 
H30 H 0.3378 0.4604 0.6737 0.032 Uiso 1 1 calc R . . 
C18 C 0.32125(18) 0.7117(2) 0.71402(10) 0.0199(4) Uani 1 1 d . . . 
H31 H 0.3500 0.8029 0.7199 0.030 Uiso 1 1 calc R . . 
H32 H 0.2716 0.6943 0.7419 0.030 Uiso 1 1 calc R . . 
H33 H 0.2775 0.6998 0.6714 0.030 Uiso 1 1 calc R . . 
C19 C 0.44418(17) 0.5757(2) 0.86791(9) 0.0155(4) Uani 1 1 d . . . 
C20 C 0.45638(19) 0.4243(2) 0.87349(10) 0.0210(4) Uani 1 1 d . . . 
H34 H 0.4145 0.3917 0.9029 0.031 Uiso 1 1 calc R . . 
H35 H 0.5375 0.4010 0.8879 0.031 Uiso 1 1 calc R . . 
H36 H 0.4249 0.3836 0.8332 0.031 Uiso 1 1 calc R . . 
C21 C 0.31649(17) 0.6123(2) 0.85157(10) 0.0200(4) Uani 1 1 d . . . 
H37 H 0.2830 0.5876 0.8857 0.030 Uiso 1 1 calc R . . 
H38 H 0.2771 0.5644 0.8143 0.030 Uiso 1 1 calc R . . 
H39 H 0.3080 0.7081 0.8443 0.030 Uiso 1 1 calc R . . 
C22 C 0.49472(18) 0.6383(2) 0.93125(9) 0.0185(4) Uani 1 1 d . . . 
H40 H 0.4820 0.7344 0.9288 0.028 Uiso 1 1 calc R . . 
H41 H 0.5771 0.6201 0.9438 0.028 Uiso 1 1 calc R . . 
H42 H 0.4573 0.6002 0.9615 0.028 Uiso 1 1 calc R . . 
C23 C 0.88849(19) 0.5840(2) 1.07009(11) 0.0237(5) Uani 1 1 d . . . 
H43 H 0.9019 0.5706 1.1150 0.028 Uiso 1 1 calc R . . 
H44 H 0.8678 0.4971 1.0497 0.028 Uiso 1 1 calc R . . 
Cl2 Cl 0.77409(5) 0.69699(6) 1.04492(3) 0.02729(13) Uani 1 1 d . . . 
Cl3 Cl 1.01472(5) 0.64309(6) 1.05303(3) 0.02826(13) Uani 1 1 d . . . 
 
loop_ 
 _atom_site_aniso_label 
 _atom_site_aniso_U_11 
 _atom_site_aniso_U_22 
 _atom_site_aniso_U_33 
 _atom_site_aniso_U_23 
 _atom_site_aniso_U_13 
 _atom_site_aniso_U_12 
Pd1 0.01371(8) 0.01095(8) 0.01201(8) 0.00141(6) 0.00174(6) 0.00046(5) 
C1 0.0139(9) 0.0146(9) 0.0104(9) -0.0005(7) 0.0002(7) -0.0004(7) 
C2 0.0157(10) 0.0177(10) 0.0148(10) -0.0020(8) 0.0058(8) -0.0033(8) 
C3 0.0153(10) 0.0167(10) 0.0212(11) -0.0041(8) 0.0035(8) -0.0016(8) 
C4 0.0184(10) 0.0129(9) 0.0152(10) -0.0012(8) 0.0037(8) -0.0012(8) 
C5 0.0176(10) 0.0114(9) 0.0172(10) -0.0017(8) 0.0032(8) 0.0023(8) 
C6 0.0144(9) 0.0155(9) 0.0136(9) -0.0020(8) 0.0033(8) -0.0007(8) 
C7 0.0159(10) 0.0262(11) 0.0208(11) -0.0042(9) 0.0055(9) 0.0037(8) 
C8 0.0209(10) 0.0129(10) 0.0182(10) 0.0026(8) 0.0019(8) -0.0021(8) 
C9 0.0184(10) 0.0196(10) 0.0147(10) -0.0022(8) 0.0069(8) -0.0025(8) 
O1 0.0257(8) 0.0161(7) 0.0284(9) -0.0052(6) 0.0029(7) -0.0024(6) 
O2 0.0244(8) 0.0205(8) 0.0191(8) -0.0031(6) -0.0032(6) -0.0038(6) 
C10 0.0255(12) 0.0258(12) 0.0208(11) -0.0053(9) -0.0014(9) -0.0057(9) 
Cl1 0.0206(2) 0.0177(2) 0.0215(3) 0.0087(2) 0.0008(2) 0.00034(19) 
P1 0.0108(2) 0.0115(2) 0.0115(2) 0.00039(18) 0.00220(19) -0.00060(18) 
C11 0.0149(9) 0.0146(9) 0.0177(10) 0.0014(8) 0.0040(8) 0.0025(8) 
C12 0.0150(10) 0.0186(10) 0.0266(11) -0.0006(9) 0.0092(9) -0.0004(8) 
C13 0.0246(11) 0.0137(10) 0.0222(11) -0.0003(8) 0.0088(9) 0.0042(8) 
C14 0.0166(10) 0.0197(11) 0.0210(11) 0.0016(9) 0.0007(8) 0.0053(8) 
C15 0.0162(10) 0.0163(10) 0.0139(10) -0.0007(8) 0.0009(8) -0.0011(8) 
C16 0.0237(11) 0.0222(11) 0.0130(10) -0.0005(8) 0.0023(8) -0.0010(9) 
C17 0.0230(11) 0.0194(11) 0.0201(11) -0.0041(9) 0.0023(9) -0.0053(9) 
C18 0.0177(10) 0.0228(11) 0.0157(10) 0.0008(8) -0.0028(8) 0.0025(8) 
C19 0.0165(10) 0.0162(10) 0.0142(10) 0.0018(8) 0.0042(8) -0.0019(8) 
C20 0.0250(11) 0.0172(10) 0.0221(11) 0.0033(9) 0.0083(9) -0.0037(9) 
C21 0.0173(10) 0.0241(11) 0.0207(11) 0.0003(9) 0.0087(9) -0.0023(8) 
C22 0.0223(11) 0.0201(10) 0.0137(10) 0.0012(8) 0.0055(8) -0.0033(8) 
C23 0.0276(12) 0.0186(10) 0.0260(12) -0.0009(9) 0.0085(10) -0.0034(9) 
Cl2 0.0215(3) 0.0369(3) 0.0220(3) -0.0034(2) 0.0024(2) 0.0004(2) 
Cl3 0.0236(3) 0.0306(3) 0.0329(3) -0.0018(2) 0.0113(2) 0.0013(2) 
 
_geom_special_details 
; 
 All esds (except the esd in the dihedral angle between two l.s. planes) 
 are estimated using the full covariance matrix.  The cell esds are taken 
 into account individually in the estimation of esds in distances, angles 
 and torsion angles; correlations between esds in cell parameters are only 
 used when they are defined by crystal symmetry.  An approximate (isotropic) 
 treatment of cell esds is used for estimating esds involving l.s. planes. 
; 
 
loop_ 
 _geom_bond_atom_site_label_1 
 _geom_bond_atom_site_label_2 
 _geom_bond_distance 
 _geom_bond_site_symmetry_2 
 _geom_bond_publ_flag 
Pd1 C1 2.047(2) . ? 
Pd1 P1 2.2537(17) . ? 
Pd1 Cl1 2.3669(14) . ? 
C1 C2 1.542(3) . ? 
C1 C6 1.565(3) . ? 
C2 C8 1.528(3) . ? 
C2 C3 1.552(3) . ? 
C3 C4 1.569(3) . ? 
C4 C9 1.506(3) . ? 
C4 C5 1.541(3) . ? 
C5 C8 1.540(3) . ? 
C5 C6 1.546(3) . ? 
C6 C7 1.531(3) . ? 
C9 O1 1.204(3) . ? 
C9 O2 1.345(3) . ? 
O2 C10 1.445(3) . ? 
P1 C19 1.902(2) . ? 
P1 C11 1.905(2) . ? 
P1 C15 1.912(2) . ? 
C11 C13 1.531(3) . ? 
C11 C14 1.540(3) . ? 
C11 C12 1.542(3) . ? 
C15 C17 1.536(3) . ? 
C15 C18 1.545(3) . ? 
C15 C16 1.547(3) . ? 
C19 C20 1.534(3) . ? 
C19 C22 1.537(3) . ? 
C19 C21 1.537(3) . ? 
C23 Cl3 1.761(3) . ? 
C23 Cl2 1.770(3) . ? 
 
loop_ 
 _geom_angle_atom_site_label_1 
 _geom_angle_atom_site_label_2 
 _geom_angle_atom_site_label_3 
 _geom_angle 
 _geom_angle_site_symmetry_1 
 _geom_angle_site_symmetry_3 
 _geom_angle_publ_flag 
C1 Pd1 P1 96.51(6) . . ? 
C1 Pd1 Cl1 108.65(7) . . ? 
P1 Pd1 Cl1 153.87(3) . . ? 
C2 C1 C6 103.83(16) . . ? 
C2 C1 Pd1 111.21(13) . . ? 
C6 C1 Pd1 112.11(13) . . ? 
C8 C2 C1 103.45(17) . . ? 
C8 C2 C3 100.56(16) . . ? 
C1 C2 C3 106.66(16) . . ? 
C2 C3 C4 102.38(17) . . ? 
C9 C4 C5 112.53(17) . . ? 
C9 C4 C3 112.64(17) . . ? 
C5 C4 C3 102.97(16) . . ? 
C8 C5 C4 102.41(17) . . ? 
C8 C5 C6 101.69(16) . . ? 
C4 C5 C6 108.29(16) . . ? 
C7 C6 C5 111.65(17) . . ? 
C7 C6 C1 116.87(17) . . ? 
C5 C6 C1 101.62(16) . . ? 
C2 C8 C5 94.42(15) . . ? 
O1 C9 O2 123.12(19) . . ? 
O1 C9 C4 125.9(2) . . ? 
O2 C9 C4 110.99(18) . . ? 
C9 O2 C10 115.84(17) . . ? 
C19 P1 C11 109.89(10) . . ? 
C19 P1 C15 108.99(10) . . ? 
C11 P1 C15 109.14(9) . . ? 
C19 P1 Pd1 118.27(7) . . ? 
C11 P1 Pd1 113.26(7) . . ? 
C15 P1 Pd1 96.15(7) . . ? 
C13 C11 C14 107.64(17) . . ? 
C13 C11 C12 108.97(17) . . ? 
C14 C11 C12 105.96(17) . . ? 
C13 C11 P1 114.13(14) . . ? 
C14 C11 P1 111.76(14) . . ? 
C12 C11 P1 108.05(14) . . ? 
C17 C15 C18 108.21(18) . . ? 
C17 C15 C16 108.51(17) . . ? 
C18 C15 C16 105.28(17) . . ? 
C17 C15 P1 116.10(14) . . ? 
C18 C15 P1 108.36(14) . . ? 
C16 C15 P1 109.82(15) . . ? 
C20 C19 C22 108.90(17) . . ? 
C20 C19 C21 109.15(17) . . ? 
C22 C19 C21 105.63(17) . . ? 
C20 C19 P1 113.88(15) . . ? 
C22 C19 P1 109.61(14) . . ? 
C21 C19 P1 109.34(14) . . ? 
Cl3 C23 Cl2 111.11(13) . . ? 
 
loop_ 
 _geom_torsion_atom_site_label_1 
 _geom_torsion_atom_site_label_2 
 _geom_torsion_atom_site_label_3 
 _geom_torsion_atom_site_label_4 
 _geom_torsion 
 _geom_torsion_site_symmetry_1 
 _geom_torsion_site_symmetry_2 
 _geom_torsion_site_symmetry_3 
 _geom_torsion_site_symmetry_4 
 _geom_torsion_publ_flag 
P1 Pd1 C1 C2 129.08(13) . . . . ? 
Cl1 Pd1 C1 C2 -43.80(14) . . . . ? 
P1 Pd1 C1 C6 -115.17(13) . . . . ? 
Cl1 Pd1 C1 C6 71.95(14) . . . . ? 
C6 C1 C2 C8 -29.04(19) . . . . ? 
Pd1 C1 C2 C8 91.70(16) . . . . ? 
C6 C1 C2 C3 76.52(19) . . . . ? 
Pd1 C1 C2 C3 -162.74(13) . . . . ? 
C8 C2 C3 C4 39.68(19) . . . . ? 
C1 C2 C3 C4 -67.94(19) . . . . ? 
C2 C3 C4 C9 -126.41(18) . . . . ? 
C2 C3 C4 C5 -4.94(19) . . . . ? 
C9 C4 C5 C8 90.30(19) . . . . ? 
C3 C4 C5 C8 -31.25(19) . . . . ? 
C9 C4 C5 C6 -162.77(17) . . . . ? 
C3 C4 C5 C6 75.68(19) . . . . ? 
C8 C5 C6 C7 -85.26(19) . . . . ? 
C4 C5 C6 C7 167.31(16) . . . . ? 
C8 C5 C6 C1 40.05(18) . . . . ? 
C4 C5 C6 C1 -67.38(19) . . . . ? 
C2 C1 C6 C7 114.98(19) . . . . ? 
Pd1 C1 C6 C7 -5.2(2) . . . . ? 
C2 C1 C6 C5 -6.77(19) . . . . ? 
Pd1 C1 C6 C5 -126.91(14) . . . . ? 
C1 C2 C8 C5 52.31(17) . . . . ? 
C3 C2 C8 C5 -57.84(18) . . . . ? 
C4 C5 C8 C2 55.07(17) . . . . ? 
C6 C5 C8 C2 -56.87(18) . . . . ? 
C5 C4 C9 O1 -7.7(3) . . . . ? 
C3 C4 C9 O1 108.2(2) . . . . ? 
C5 C4 C9 O2 171.97(17) . . . . ? 
C3 C4 C9 O2 -72.2(2) . . . . ? 
O1 C9 O2 C10 0.5(3) . . . . ? 
C4 C9 O2 C10 -179.14(17) . . . . ? 
C1 Pd1 P1 C19 67.15(11) . . . . ? 
Cl1 Pd1 P1 C19 -128.32(9) . . . . ? 
C1 Pd1 P1 C11 -63.51(9) . . . . ? 
Cl1 Pd1 P1 C11 101.02(8) . . . . ? 
C1 Pd1 P1 C15 -177.42(8) . . . . ? 
Cl1 Pd1 P1 C15 -12.88(8) . . . . ? 
C19 P1 C11 C13 79.57(17) . . . . ? 
C15 P1 C11 C13 -39.89(17) . . . . ? 
Pd1 P1 C11 C13 -145.70(13) . . . . ? 
C19 P1 C11 C14 -42.86(17) . . . . ? 
C15 P1 C11 C14 -162.32(14) . . . . ? 
Pd1 P1 C11 C14 91.87(14) . . . . ? 
C19 P1 C11 C12 -159.06(13) . . . . ? 
C15 P1 C11 C12 81.48(16) . . . . ? 
Pd1 P1 C11 C12 -24.33(15) . . . . ? 
C19 P1 C15 C17 -43.07(18) . . . . ? 
C11 P1 C15 C17 76.94(18) . . . . ? 
Pd1 P1 C15 C17 -165.81(15) . . . . ? 
C19 P1 C15 C18 78.89(16) . . . . ? 
C11 P1 C15 C18 -161.10(14) . . . . ? 
Pd1 P1 C15 C18 -43.85(14) . . . . ? 
C19 P1 C15 C16 -166.60(14) . . . . ? 
C11 P1 C15 C16 -46.58(16) . . . . ? 
Pd1 P1 C15 C16 70.66(14) . . . . ? 
C11 P1 C19 C20 -44.92(17) . . . . ? 
C15 P1 C19 C20 74.63(17) . . . . ? 
Pd1 P1 C19 C20 -177.09(12) . . . . ? 
C11 P1 C19 C22 77.34(16) . . . . ? 
C15 P1 C19 C22 -163.11(14) . . . . ? 
Pd1 P1 C19 C22 -54.83(16) . . . . ? 
C11 P1 C19 C21 -167.31(14) . . . . ? 
C15 P1 C19 C21 -47.75(17) . . . . ? 
Pd1 P1 C19 C21 60.52(15) . . . . ? 
 
_diffrn_measured_fraction_theta_max    0.978 
_diffrn_reflns_theta_full              27.48 
_diffrn_measured_fraction_theta_full   0.978 
_refine_diff_density_max    0.893 
_refine_diff_density_min   -0.366 
_refine_diff_density_rms    0.072 
